# Supplementary material for: Religious change preceded economic change in the 20th century
Source: PubMed Central journal article supplement (PMC6051740; doi:10.1126/sciadv.aar8680), 2018-07-18
Supplement: aar8680_SM.pdf [file aar8680_SM.pdf]

## Supplementary Materials for

### Religious change preceded economic change in the 20th century

Damian J. Ruck, R. Alexander Bentley\*, Daniel J. Lawson

\*Corresponding author. Email: rabentley@utk.edu

Published 18 July 2018, *Sci. Adv.* **4**, eaar8680 (2018)

DOI: 10.1126/sciadv.aar8680

#### This PDF file includes:

Section S1. WVS and EVS

Section S2. Exploratory factor analysis

Section S3. Cultural factor loadings

Table S1. Participation in the different waves of the WVS and EVS.

Table S2. Participating countries in the WEVS.

Table S3. Questions common to all eight waves of the WVS and EVS.

Table S4. Secularization.

Table S5. Institutional confidence.

Table S6. Openness to intrinsic differences.

Table S7. Prosociality.

Table S8. Interest of politics.

Table S9. Wellbeing.

Table S10. Political engagement.

Table S11. Tolerance of prohibited behaviors.

Table S12. Openness to extrinsic differences.

Table S13. Independence of birth decade,  $t$ , versus WEVS phase,  $p$ , for secularization,  $S_{t,p}$ , and tolerance,  $V_{t,p}$ .

Table S14. Multilevel time-lagged linear models (see Materials and Methods) demonstrating that secularization predicts GDP and not vice versa (models 1 to 6); tolerance predicts GDP better than secularization (models 7 to 12) and education predicts future GDP, but not secularization (models 13 to 18).

Table S15. Time-lagged models, models 1 to 6 (see Materials and Methods), of  $S$  versus GDP for cohorts in their first decade or childhood ( $y = 0$  decades, top row), teenage years ( $y = 1$  decade, middle row), and twenties ( $y = 2$  decades, bottom row).

Table S16. Multilevel time-lagged models, but with secularization ( $S_{alt}$ ) measured using the average of six indicators, which are subjectively associated with religiosity.

Table S17. Language categories assigned to WEVS countries, using Ethnologue data.

Fig. S1. The ordered factor loadings on WEVS survey questions, following EFA analysis with oblique rotation.

## **Section S1. WVS and EVS**

The WVS and EVS were administered in waves. There have been five waves of the WVS and three of the EVS since 1990 (see table S1 for participation figures). A WVS and an EVS wave from the early eighties were excluded because the questions did not sufficiently overlap with those from later waves and they were only administered in a few, mainly Western, countries. The total number of participants since 1990 is 475,342.

In total the survey was carried out in 109 unique countries representing over 90% of the world's population and all geographical regions (a list of the participating countries can be found in table S13). In order to set the data in a form amenable to the EFA regime, all categorical response data were removed, leaving just data of continuous and ordinal types (e.g. binary and Likert scales). All of the variables were transformed to zero mean and unit variance. Finally, missing values were mean imputed. We are able to aggregate the World Value Survey (WVS) and the European Value Survey (EVS) together—we refer to the combined data as WEVS—because the 64 core questions, which are common to the later five waves of the WVS, are present in the later three waves of the EVS. These questions are contained in table S3.

Table S1. Participation in the different waves of the WVS and EVS.

| EVS/WVS | Wave | Years     | No. Countries | No. Participants |
|---------|------|-----------|---------------|------------------|
| WVS     | 2    | 1990-1994 | 18            | 24,558           |
| EVS     | 2    | 1990-1994 | 29            | 38,213           |
| WVS     | 3    | 1995-1998 | 56            | 76,075           |
| EVS     | 3    | 1995-1999 | 33            | 41,125           |
| WVS     | 4    | 1999-2004 | 41            | 60,045           |
| EVS     | 4    | 2005-2010 | 47            | 66,281           |
| WVS     | 5    | 2005-2009 | 58            | 83,975           |
| WVS     | 6    | 2010-2014 | 60            | 85,070           |

Table S2. Participating countries in the WEVS.

|              |                |            |                       |                     |
|--------------|----------------|------------|-----------------------|---------------------|
| Albania      | Cyprus (T)     | Iran       | Morocco               | South Africa        |
| Algeria      | Czech Rep.     | Iraq       | Netherlands           | South Korea         |
| Andorra      | Denmark        | Ireland    | New Zealand           | Spain               |
| Argentina    | Dominican Rep. | Israel     | Nigeria               | Sweden              |
| Armenia      | Ecuador        | Italy      | North Ireland         | Switzerland         |
| Australia    | Egypt          | Japan      | Norway                | Taiwan              |
| Austria      | El Salvador    | Jordan     | Pakistan              | Tanzania            |
| Azerbaijan   | Estonia        | Kazakhstan | Palestine             | Thailand            |
| Bahrain      | Ethiopia       | Kosovo     | Peru                  | Trinidad and Tobago |
| Bangladesh   | Finland        | Kuwait     | Philippines           | Tunisia             |
| Belarus      | France         | Kyrgyzstan | Poland                | Turkey              |
| Belgium      | Georgia        | Latvia     | Portugal              | Uganda              |
| Bosnia       | Germany        | Lebanon    | Puerto Rico           | Ukraine             |
| Brazil       | Ghana          | Libya      | Qatar                 | United States       |
| Bulgaria     | Great Britain  | Lithuania  | Romania               | Uruguay             |
| Burkina Faso | Greece         | Luxembourg | Russia                | Uzbekistan          |
| Canada       | Guatemala      | Macedonia  | Rwanda                | Venezuela           |
| Chile        | Hong Kong      | Malaysia   | Saudi Arabia          | Viet Nam            |
| China        | Hungary        | Mali       | Serbia and Montenegro | Yemen               |
| Colombia     | Iceland        | Malta      | Singapore             | Zambia              |
| Croatia      | India          | Mexico     | Slovakia              | Zimbabwe            |
| Cyprus (G)   | Indonesia      | Moldova    | Slovenia              |                     |

Table S3. Questions common to all eight waves of the WVS and EVS.

---

|                                                                                |                                                             |
|--------------------------------------------------------------------------------|-------------------------------------------------------------|
| Important in life: Family                                                      | Important in life: Friends                                  |
| Important in life: Leisure time                                                | Important in life: Politics                                 |
| Important in life: Work                                                        | Important in life: Religion                                 |
| Feeling of happiness                                                           | State of health (subjective)                                |
| Important child qualities: independence                                        | Important child qualities: hard work                        |
| Important child qualities: feeling of responsibility                           | Important child qualities: imagination                      |
| Important child qualities: tolerance and respect for other people              | Important child qualities: thrift saving money and things   |
| Important child qualities: determination perseverance                          | Important child qualities: religious faith                  |
| Important child qualities: unselfishness                                       | Important child qualities: obedience                        |
| Neighbours: People of a different race                                         | Neighbours: Heavy drinkers                                  |
| Neighbours: Immigrants/foreign workers                                         | Neighbours: People who have AIDS                            |
| Neighbours: Drug addicts                                                       | Neighbours: Homosexuals                                     |
| Most people can be trusted                                                     | Satisfaction with your life                                 |
| How much freedom of choice and control                                         | Jobs scarce: Men should have more right to a job than women |
| Jobs scarce: Employers should give priority to (nation) people than immigrants | Being a housewife just as fulfilling                        |
| Future changes: Greater respect for authority                                  | Interest in politics                                        |
| Political action: signing a petition                                           | Political action: joining in boycotts                       |
| Political action: attending lawful/peaceful demonstrations                     | Self positioning in political scale                         |
| Income equality                                                                | Private vs state ownership of business                      |
| Government responsibility                                                      | Competition good or harmful                                 |
| Confidence: Churches                                                           | Confidence: Armed Forces                                    |
| Confidence: The Press                                                          | Confidence: Labour Unions                                   |
| Confidence: The Police                                                         | Confidence: Parliament                                      |
| Confidence: The Civil Services                                                 | Confidence: The Government                                  |
| Confidence: The Political Parties                                              | Confidence: Major Companies                                 |
| How often do you attend religious services                                     | Religious person                                            |
| How important is God in your life                                              | Justifiable: claiming government benefits                   |
| Justifiable: avoiding a fare on public transport                               | Justifiable: cheating on taxes                              |
| Justifiable: someone accepting a bribe                                         | Justifiable: homosexuality                                  |
| Justifiable: prostitution                                                      | Justifiable: abortion                                       |
| Justifiable: divorce                                                           | Justifiable: euthanasia                                     |
| Justifiable: suicide                                                           | How proud of nationality                                    |

---

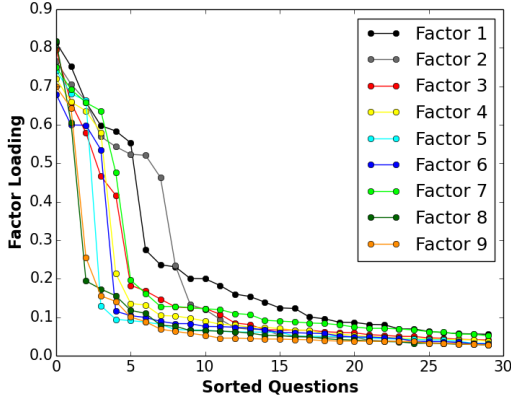

Fig. S1. The ordered factor loadings on WEVS survey questions, following EFA analysis with oblique rotation.

## Section S2. Exploratory Factor Analysis (EFA)

Exploratory Factor Analysis (EFA) is an unsupervised method to uncover any underlying structure in large multivariate dataset. EFA assumes each observed variable in the dataset is a weighted linear combination of some set of hidden factors that are to be predicted. This procedure is put more formally in Equation S1; where  $y_n$  is variable  $n$ ,  $F_m$  is hidden factor  $m$ ,  $w_{n,m}$  is the contribution of factor  $F_m$  to variable  $y_n$  and  $\epsilon_n$  is the error term for variable  $n$ . We fit this model using maximum likelihood (41):

$$y_n = w_{n,1}F_1 + w_{n,2}F_2 + \dots + w_{n,m}F_m + \epsilon_n \quad (\text{S1})$$

The second part of the EFA regime is an oblique rotation. Rotation acts to improve the interpretability of factors by approaching a simple structure in the factor loading matrix. A factor loading matrix has a perfect simple structure if the following criteria are met (42)

1. Each factor has a small subset of variables with a large factor loadings.
2. The remaining factor loadings should be vanishingly small.
3. Each variable should have a large factor loading on one factor only.

The approximate simple structure, obtained using the WEVS data, is illustrated in Figure 1 where each factor is highly loaded by a small set of variables with a bulk having small loadings. We use an “oblmin” rotation, an oblique rotation, rather than an orthogonal rotation. An oblique rotation relaxes the orthogonality constraint implicit in EFA, so it allows greater freedom when obtaining simple structure. Plus, the orthogonal assumption does not correspond with the real world, where definable cultural values are often correlated.

Table S4. **Secularization** - Factor 1.

| WVS question                               | loading |
|--------------------------------------------|---------|
| Important in life: Religion                | 0.82    |
| How important is God in your life          | -0.82   |
| Religious person                           | 0.71    |
| How often do you attend religious services | 0.65    |
| Confidence: The Churches                   | 0.64    |
| Important child qualities: Religious faith | 0.53    |

Given our focus on the interpretability of factors by maximizing simple structure in the factor loading matrix, we chose the number of factors to retain accordingly. The “Very Simple Structure” (VSS) algorithm selects the number of factors which maximizes simple structure (42), defined as

$$\Sigma_{res} = \Sigma - SS^T \quad (S2)$$

$$VSS = 1 - \frac{\Sigma_{res}}{\Sigma} \quad (S3)$$

where  $\Sigma$  is the real correlation matrix of the WEVS data and  $S$  is the simplified factor loading matrix. The VSS score can take values between one and zero; it takes a value of one when simple structure is present and zero when not. VSS is defined for a given “complexity,”  $c$ , which is the number of factor loadings retained when defining  $S$ ; for example, if  $c = 5$ , then all but the highest five factor loadings are set to zero.  $\Sigma_{res}$  is the error created when the simplified correlation matrix  $SS^T$  is compared to the real one ( $\Sigma$ ). If  $\sigma$  can be recreated using just the  $c$  highest factor loadings, then this is the definition of a simple structure and VSS will be close to one.

All aspects of the EFA regime were implemented in R using the ‘psych’ package (<http://personality-project.org/r/psych/>).

### Section S3. Cultural factor loadings

Tables S4-S12 below list the most significant sets of WEVS questions, and their factor loadings, for Factors 1-9 respectively.

**Table S5. Institutional confidence.- Factor 2.**

| WVS question                  | loading |
|-------------------------------|---------|
| Confidence: Parliament        | 0.81    |
| Confidence: The Government    | 0.73    |
| Confidence: The Civil service | 0.70    |
| Confidence: Political Parties | 0.70    |
| Confidence: The police        | 0.58    |
| Confidence: Labour Unions     | 0.53    |
| Confidence: Major Companies   | 0.51    |
| Confidence: The press         | 0.50    |
| Confidence: The armed forces  | 0.44    |

**Table S6. Openness to intrinsic differences.- Factor 3.**

| WVS question                    | loading |
|---------------------------------|---------|
| Neighbors: Drug addicts         | 0.68    |
| Neighbors: Homosexuals          | 0.63    |
| Neighbors: Heavy drinkers       | 0.58    |
| Neighbors: People who have AIDS | 0.55    |

**Table S7. Prosociality.- Factor 4.**

| WVS question                                             | loading |
|----------------------------------------------------------|---------|
| Justifiable: Cheating on taxes                           | 0.72    |
| Justifiable: Avoiding a fare on public transport         | 0.66    |
| Justifiable: Someone accepting a bribe                   | 0.64    |
| Justifiable: Claiming government benefits (not entitled) | 0.58    |

**Table S8. Interest of politics.- Factor 5.**

| WVS question                | loading |
|-----------------------------|---------|
| Important in life: Politics | 0.88    |
| Interest in politics        | 0.59    |

Table S9. **Wellbeing.** - Factor 6.

| WVS question                                | loading |
|---------------------------------------------|---------|
| Satisfaction with your life                 | -0.71   |
| Feeling of happiness                        | 0.67    |
| State of health (subjective)                | 0.50    |
| Freedom of choice and control over own life | -0.46   |

Table S10. **Political engagement.** - Factor 7

| WVS question                      | loading |
|-----------------------------------|---------|
| Joining in boycotts               | 0.74    |
| Attending peaceful demonstrations | 0.71    |
| Signing a petition                | 0.66    |

Table S11. **Tolerance of prohibited behaviors.** - Factor 8.

| WVS question               | loading |
|----------------------------|---------|
| Justifiable: Divorce       | 0.74    |
| Justifiable: Abortion      | 0.73    |
| Justifiable: Homosexuality | 0.68    |
| Justifiable: Prostitution  | 0.62    |
| Justifiable: Euthanasia    | 0.55    |
| Justifiable: Suicide       | 0.52    |

Table S12. **Openness to extrinsic differences.** - Factor 9.

| WVS question                          | loading |
|---------------------------------------|---------|
| Neighbors: People of a different race | 0.72    |
| Neighbors: Immigrants/foreign workers | 0.66    |



Table S13. Independence of birth decade,  $t$ , versus WEVS phase,  $p$ , for secularization,  $S_{t,p}$ , and tolerance,  $V_{t,p}$ . Entries show proportion of variance explained by  $H_1$ . Likelihood ratio,  $H_0$  vs.  $H_1$ , in parentheses (Materials and Methods). Bonferroni corrected significance of 5%: \*\*  $p < 0.0006$ .

| Country       | $S_{t,p}$      | $V_{t,p}$      | Country       | $S_{t,p}$      | $V_{t,p}$      |
|---------------|----------------|----------------|---------------|----------------|----------------|
| Albania       | 0.233(1.557)   | 0.006(1.024)   | Latvia        | 0.133(1.423)** | 0.007(1.054)   |
| Algeria       | 0.038(1.076)   | 0.000(1.004)   | Lithuania     | 0.021(1.102)   | 0.004(1.026)   |
| Argentina     | 0.013(1.069)   | 0.021(1.127)   | Macedonia     | 0.061(1.219)   | 0.116(1.275)   |
| Armenia       | 0.002(1.019)   | 0.020(1.317)** | Malaysia      | 0.113(1.047)   | 0.062(1.402)   |
| Australia     | 0.005(1.024)   | 0.006(1.036)   | Mexico        | 0.014(1.060)   | 0.010(1.054)   |
| Austria       | 0.004(1.033)   | 0.024(1.200)   | Moldova       | 0.053(1.144)   | 0.042(1.165)   |
| Azerbaijan    | 0.144(1.190)   | 0.000(1.002)   | Morocco       | 0.052(1.120)   | 0.109(1.282)** |
| Bangladesh    | 0.013(1.005)   | 0.307(1.067)   | Netherlands   | 0.022(1.120)   | 0.052(1.163)   |
| Belarus       | 0.025(1.107)   | 0.024(1.151)   | New Zealand   | 0.034(1.056)   | 0.054(1.160)   |
| Belgium       | 0.038(1.223)   | 0.044(1.217)   | Nigeria       | 0.148(1.143)   | 0.113(1.326)** |
| Bosnia        | 0.365(1.922)** | 0.011(1.067)   | Norway        | 0.017(1.119)   | 0.008(1.108)   |
| Brazil        | 0.097(1.163)   | 0.001(1.005)   | Pakistan      | 0.048(1.058)   | 0.032(1.102)   |
| Bulgaria      | 0.039(1.207)   | 0.026(1.186)   | Peru          | 0.039(1.145)   | 0.049(1.202)   |
| Canada        | 0.014(1.105)   | 0.010(1.035)   | Philippines   | 0.022(1.009)   | 0.044(1.077)   |
| Chile         | 0.036(1.204)   | 0.049(1.707)** | Poland        | 0.005(1.024)   | 0.023(1.120)   |
| China         | 0.008(1.106)   | 0.063(1.316)** | Portugal      | 0.022(1.175)   | 0.010(1.091)   |
| Colombia      | 0.004(1.008)   | 0.001(1.004)   | Puerto Rico   | 0.000(1.001)   | 0.002(1.012)   |
| Croatia       | 0.114(1.127)   | 0.006(1.036)   | Romania       | 0.081(1.449)** | 0.058(1.365)** |
| Czech Rep.    | 0.039(1.186)   | 0.018(1.107)   | Russia        | 0.070(1.226)   | 0.008(1.063)   |
| Denmark       | 0.096(1.495)** | 0.016(1.105)   | Rwanda        | 0.030(1.234)   | 0.001(1.000)   |
| Egypt         | 0.015(1.115)   | 0.010(1.091)   | Serbia        | 0.074(1.371)** | 0.038(1.276)** |
| Estonia       | 0.070(1.163)   | 0.001(1.005)   | Singapore     | 0.006(1.048)   | 0.003(1.026)   |
| Finland       | 0.021(1.107)   | 0.049(1.407)   | Slovakia      | 0.024(1.122)   | 0.002(1.017)   |
| France        | 0.039(1.139)   | 0.005(1.023)   | Slovenia      | 0.008(1.028)   | 0.016(1.178)   |
| Georgia       | 0.007(1.101)   | 0.037(1.192)   | South Africa  | 0.058(1.122)   | 0.003(1.033)   |
| Germany       | 0.072(1.500)** | 0.063(1.639)** | South Korea   | 0.061(1.266)   | 0.016(1.189)   |
| Ghana         | 0.363(1.102)   | 0.094(1.056)   | Spain         | 0.002(1.033)   | 0.008(1.117)   |
| Great Britain | 0.029(1.212)   | 0.005(1.024)   | Sweden        | 0.036(1.119)   | 0.033(1.275)   |
| Greece        | 9.271(1.000)   | 0.018(1.196)   | Switzerland   | 0.018(1.142)   | 0.020(1.187)   |
| Hong Kong     | 0.230(1.050)   | 0.003(1.016)   | Taiwan        | 0.006(1.034)   | 0.004(1.033)   |
| Hungary       | 0.066(1.547)   | 0.007(1.021)   | Thailand      | 0.041(1.205)   | 0.162(1.253)   |
| India         | 0.151(1.413)** | 0.008(1.101)   | Trinidad      | 1.889(1.000)   | 0.022(1.050)   |
| Indonesia     | 0.043(1.104)   | 0.002(1.004)   | Turkey        | 0.064(1.136)   | 0.092(1.234)   |
| Iran          | 0.005(1.016)   | 0.040(1.203)   | Ukraine       | 0.120(1.254)   | 0.018(1.120)   |
| Iraq          | 0.088(1.086)   | 0.023(1.213)   | United States | 0.013(1.063)   | 0.006(1.026)   |
| Ireland       | 0.015(1.203)   | 0.039(1.393)   | Uruguay       | 0.008(1.055)   | 0.109(1.379)   |
| Italy         | 0.004(1.014)   | 0.005(1.031)   | Venezuela     | 0.146(1.149)   | 0.024(1.047)   |
| Japan         | 0.026(1.123)   | 0.026(1.154)   | Viet Nam      | 0.078(1.013)   | 0.828(1.079)   |
| Jordan        | 0.035(1.103)   | 0.005(1.027)   | Zimbabwe      | 0.321(1.031)   | 0.000(1.003)   |
| Kyrgyzstan    | 0.003(1.002)   | 0.311(1.126)   |               |                |                |

Table S14. Multilevel time-lagged linear models (see Materials and Methods) demonstrating that secularization predicts GDP and not vice versa (models 1 to 6); tolerance predicts GDP better than secularization (models 7 to 12) and education predicts future GDP, but not secularization (models 13 to 18). Row labels are abbreviated as follows: “dep” is the dependent variable, GDP is historical GDP,  $S$  is effect of past secularization,  $E$  is historical education,  $V$  is historical tolerance,  $y$  is time lag in decades,  $N$  is the number of data points,  $n$  is the number of unique countries,  $i$  is variance explained by the country random effect,  $h$  is variance explained by cultural-history and  $R^2$  is total variance explained. Standard errors are in parentheses. Bonferroni corrected significance: \*  $p < 0.1$ ; \*\*  $p < 0.05$ ; \*\*\*  $p < 0.01$ .

|       | M1             | M2             | M3             | M4             | M5             | M6             |
|-------|----------------|----------------|----------------|----------------|----------------|----------------|
| dep   | S              | S              | S              | GDP            | GDP            | GDP            |
| GDP   | 0 (0.01)       | -0.02 (0.03)   | 0.08 (0.06)    | 0.98 (0.02)*** | 0.87 (0.04)*** | 0.85 (0.05)*** |
| S     | 1.02 (0.01)*** | 0.97 (0.02)*** | 0.75 (0.02)*** | 0.1 (0.01)***  | 0.28 (0.03)*** | 0.5 (0.03)***  |
| y     | 1              | 2              | 3              | 1              | 2              | 3              |
| N     | 417            | 324            | 229            | 497            | 469            | 387            |
| n     | 101            | 95             | 83             | 96             | 101            | 101            |
| i     | 0.05***        | 0.14***        | 0.34***        | 0.08***        | 0.21***        | 0.37***        |
| h     | 0.05**         | 0.14***        | 0.3***         | 0.02           | 0.12*          | 0.19           |
| $R^2$ | 0.99           | 0.99           | 0.99           | 0.92           | 0.89           | 0.95           |

  

|       | M7             | M8             | M9             | M10            | M11            | M12            |
|-------|----------------|----------------|----------------|----------------|----------------|----------------|
| dep   | S              | S              | S              | GDP            | GDP            | GDP            |
| GDP   | -0.01 (0.02)   | -0.01 (0.03)   | 0.08 (0.06)    | 0.95 (0.02)*** | 0.78 (0.04)*** | 0.71 (0.05)*** |
| S     | 1.01 (0.02)*** | 0.99 (0.04)*** | 0.81 (0.06)*** | 0.03 (0.02)    | 0.01 (0.04)    | 0.07 (0.06)    |
| V     | 0.01 (0.02)    | -0.02 (0.03)   | -0.04 (0.05)   | 0.09 (0.02)*** | 0.32 (0.04)*** | 0.44 (0.05)*** |
| y     | 1              | 2              | 3              | 1              | 2              | 3              |
| N     | 417            | 324            | 229            | 497            | 469            | 387            |
| n     | 101            | 95             | 83             | 96             | 101            | 101            |
| i     | 0.05***        | 0.14***        | 0.33***        | 0.07***        | 0.19***        | 0.31***        |
| h     | 0.04           | 0.14***        | 0.28***        | 0.02           | 0.1            | 0.11           |
| $R^2$ | 0.99           | 0.99           | 0.99           | 0.92           | 0.9            | 0.95           |

  

|       | M13            | M14            | M15            | M16            | M17            | M18            |
|-------|----------------|----------------|----------------|----------------|----------------|----------------|
| dep   | S              | S              | S              | GDP            | GDP            | GDP            |
| GDP   | 0 (0.02)       | -0.04 (0.05)   | 0.1 (0.08)     | 0.98 (0.03)*** | 0.83 (0.05)*** | 0.75 (0.08)*** |
| S     | 1.03 (0.01)*** | 0.97 (0.02)*** | 0.74 (0.03)*** | 0.07 (0.01)*** | 0.22 (0.02)*** | 0.4 (0.03)***  |
| E     | -0.06 (0.09)   | 0.14 (0.2)     | 0.18 (0.3)     | 0.39 (0.09)*** | 0.97 (0.19)*** | 1.31 (0.3)***  |
| y     | 1              | 2              | 3              | 1              | 2              | 3              |
| N     | 343            | 274            | 205            | 409            | 382            | 318            |
| n     | 70             | 69             | 66             | 70             | 70             | 70             |
| i     | 0.05***        | 0.15***        | 0.36***        | 0.05           | 0.16***        | 0.27***        |
| h     | 0.05           | 0.12*          | 0.32**         | 0.03           | 0.09           | 0.16           |
| $R^2$ | 0.99           | 0.99           | 0.99           | 0.94           | 0.91           | 0.94           |

Table S15. Time-lagged models, models 1 to 6 (see Materials and Methods), of  $S$  versus  $GDP$  for cohorts in their first decade or childhood ( $y = 0$  decades, top row), teenage years ( $y = 1$  decade, middle row) and twenties ( $y = 2$  decades, bottom row). In each row, “dep” is the dependent variable,  $GDP$  is historical  $GDP$ ,  $S$  is effect of past secularization,  $y$  is time lag in decades,  $N$  is number of data points,  $n$  is number of unique countries,  $i$  is variance explained by the country random effect,  $h$  is variance explained by cultural-history and  $R^2$  is total variance explained. Standard errors are in parentheses. Bonferroni corrected significance: \*  $p < 0.1$ ; \*\*  $p < 0.05$ ; \*\*\*  $p < 0.01$ . Significance: \*\*  $p < 0.01$ ; \*\*\*  $p < 0.001$ .

|       | M1             | M2             | M3             | M4             | M5             | M6             |
|-------|----------------|----------------|----------------|----------------|----------------|----------------|
| dep   | S              | S              | S              | GDP            | GDP            | GDP            |
| GDP   | 0 (0.01)       | -0.02 (0.03)   | 0.08 (0.06)    | 0.98 (0.02)*** | 0.87 (0.04)*** | 0.85 (0.05)*** |
| S     | 1.02 (0.01)*** | 0.97 (0.02)*** | 0.75 (0.02)*** | 0.1 (0.01)***  | 0.28 (0.03)*** | 0.5 (0.03)***  |
| y     | 1              | 2              | 3              | 1              | 2              | 3              |
| N     | 417            | 324            | 229            | 497            | 469            | 387            |
| n     | 101            | 95             | 83             | 96             | 101            | 101            |
| i     | 0.05***        | 0.14***        | 0.34***        | 0.08***        | 0.21***        | 0.37***        |
| h     | 0.05**         | 0.14***        | 0.3***         | 0.02           | 0.12*          | 0.19           |
| $R^2$ | 0.99           | 0.99           | 0.99           | 0.92           | 0.89           | 0.95           |

  

|       | M1(+1)         | M2(+1)         | M3(+1)         | M4(+1)         | M5(+1)         | M6(+1)         |
|-------|----------------|----------------|----------------|----------------|----------------|----------------|
| dep   | S              | S              | S              | GDP            | GDP            | GDP            |
| GDP   | -0.01 (0.01)   | -0.02 (0.03)   | 0.02 (0.04)    | 0.99 (0.02)*** | 0.82 (0.04)*** | 0.84 (0.05)*** |
| S     | 1.02 (0.01)*** | 0.97 (0.02)*** | 0.77 (0.03)*** | 0.11 (0.01)*** | 0.32 (0.03)*** | 0.4 (0.04)***  |
| y     | 1              | 2              | 3              | 1              | 2              | 3              |
| N     | 449            | 353            | 261            | 493            | 411            | 323            |
| n     | 101            | 100            | 93             | 101            | 101            | 101            |
| i     | 0.06***        | 0.15***        | 0.32***        | 0.08***        | 0.24***        | 0.34***        |
| h     | 0.05***        | 0.13***        | 0.32***        | 0.03           | 0.15***        | 0.16           |
| $R^2$ | 0.99           | 0.99           | 0.99           | 0.93           | 0.92           | 0.94           |

  

|       | M1(+2)         | M2(+2)         | M3(+2)         | M4(+2)         | M5(+2)         | M6(+2)         |
|-------|----------------|----------------|----------------|----------------|----------------|----------------|
| dep   | S              | S              | S              | GDP            | GDP            | GDP            |
| GDP   | -0.02 (0.01)   | -0.05 (0.02)   | -0.04 (0.03)   | 0.95 (0.02)*** | 0.84 (0.04)*** | 0.81 (0.06)*** |
| S     | 1.02 (0.01)*** | 0.98 (0.02)*** | 0.81 (0.03)*** | 0.14 (0.02)*** | 0.24 (0.03)*** | 0.33 (0.04)*** |
| y     | 1              | 2              | 3              | 1              | 2              | 3              |
| N     | 475            | 374            | 279            | 424            | 336            | 248            |
| n     | 101            | 100            | 98             | 101            | 101            | 94             |
| i     | 0.06***        | 0.15***        | 0.3***         | 0.11***        | 0.24***        | 0.34***        |
| h     | 0.05**         | 0.13***        | 0.28***        | 0.04           | 0.14***        | 0.18**         |
| $R^2$ | 0.99           | 0.99           | 0.99           | 10 0.94        | 0.91           | 0.93           |

Table S16. Multilevel time-lagged models, but with secularization ( $S_{alt}$ ) measured using the average of six indicators, which are subjectively associated with religiosity. The results are similar to those using the secularization  $S$  derived using EFA: Secularization predicts development and not vice-versa. In each row, “dep” is the dependent variable, GDP is historical GDP,  $S$  is effect of past secularization,  $y$  is time lag in decades,  $N$  is number of data points,  $n$  is number of unique countries,  $i$  is variance explained by the country random effect,  $h$  is variance explained by cultural-history and  $R^2$  is total variance explained. Standard errors are in parentheses. Bonferroni corrected significance: \*  $p < 0.1$ ; \*\*  $p < 0.05$ ; \*\*\*  $p < 0.01$ .

|           | M1             | M2             | M3             | M4             | M5             | M6             |
|-----------|----------------|----------------|----------------|----------------|----------------|----------------|
| dep       | $S_{alt}$      | $S_{alt}$      | $S_{alt}$      | GDP            | GDP            | GDP            |
| GDP       | 0 (0.01)       | -0.02 (0.03)   | 0.04 (0.05)    | 0.99 (0.02)*** | 0.9 (0.04)***  | 0.84 (0.05)*** |
| $S_{alt}$ | 1.02 (0.01)*** | 0.97 (0.02)*** | 0.81 (0.02)*** | 0.1 (0.01)***  | 0.28 (0.02)*** | 0.51 (0.03)*** |
| $y$       | 1              | 2              | 3              | 1              | 2              | 3              |
| $N$       | 478            | 387            | 289            | 559            | 512            | 427            |
| $n$       | 101            | 98             | 86             | 98             | 101            | 101            |
| $i$       | 0.05***        | 0.14***        | 0.3***         | 0.08***        | 0.21***        | 0.37***        |
| $h$       | 0.04**         | 0.11**         | 0.25***        | 0.02           | 0.13**         | 0.21*          |
| $R^2$     | 0.99           | 0.98           | 0.98           | 0.92           | 0.89           | 0.94           |

Table S17. Language categories assigned to WEVS countries, using Ethnologue data.

| <b>country</b> | <b>language</b>       | <b>country</b> | <b>language</b>       | <b>country</b>        | <b>language</b>      |
|----------------|-----------------------|----------------|-----------------------|-----------------------|----------------------|
| Albania        | <i>Albania</i>        | Greece         | <i>Greek-Armenian</i> | Peru                  | <i>Italic</i>        |
| Algeria        | <i>Semitic</i>        | Guatemala      | <i>Italic</i>         | Philippines           | <i>Austronesian</i>  |
| Andorra        | <i>Italic</i>         | Hong Kong      | <i>Sino-Tibetan</i>   | Poland                | <i>Balto-Slavic</i>  |
| Argentina      | <i>Italic</i>         | Hungary        | <i>Uralic</i>         | Portugal              | <i>Italic</i>        |
| Armenia        | <i>Greek-Armenian</i> | Iceland        | <i>Germanic</i>       | Puerto Rico           | <i>Italic</i>        |
| Australia      | <i>Germanic</i>       | India          | <i>Indo-Aryan</i>     | Qatar                 | <i>Semitic</i>       |
| Austria        | <i>Germanic</i>       | Indonesia      | <i>Austronesian</i>   | Romania               | <i>Italic</i>        |
| Azerbaijan     | <i>Turkic</i>         | Iran           | <i>Indo-Aryan</i>     | Russia                | <i>Balto-Slavic</i>  |
| Bahrain        | <i>Semitic</i>        | Iraq           | <i>Semitic</i>        | Rwanda                | <i>Niger_Congo</i>   |
| Bangladesh     | <i>Indo-Aryan</i>     | Ireland        | <i>Germanic</i>       | Saudi Arabia          | <i>Semitic</i>       |
| Belarus        | <i>Balto-Slavic</i>   | Israel         | <i>Semitic</i>        | Serbia and Montenegro | <i>Balto-Slavic</i>  |
| Belgium        | <i>Germanic</i>       | Italy          | <i>Italic</i>         | Singapore             | <i>Germanic</i>      |
| Bosnia         | <i>Balto-Slavic</i>   | Japan          | <i>Japan</i>          | Slovakia              | <i>Balto-Slavic</i>  |
| Brazil         | <i>Italic</i>         | Jordan         | <i>Semitic</i>        | Slovenia              | <i>Balto-Slavic</i>  |
| Bulgaria       | <i>Balto-Slavic</i>   | Kazakhstan     | <i>Turkic</i>         | South Africa          | <i>Germanic</i>      |
| Burkina Faso   | <i>Italic</i>         | Kosovo         | <i>Albania</i>        | South Korea           | <i>Korea</i>         |
| Canada         | <i>Germanic</i>       | Kuwait         | <i>Semitic</i>        | Spain                 | <i>Italic</i>        |
| Chile          | <i>Italic</i>         | Kyrgyzstan     | <i>Turkic</i>         | Sweden                | <i>Germanic</i>      |
| China          | <i>Sino-Tibetan</i>   | Latvia         | <i>Balto-Slavic</i>   | Switzerland           | <i>Germanic</i>      |
| Colombia       | <i>Italic</i>         | Lebanon        | <i>Semitic</i>        | Taiwan                | <i>Sino-Tibetan</i>  |
| Croatia        | <i>Balto-Slavic</i>   | Libya          | <i>Semitic</i>        | Tanzania              | <i>Niger_Congo</i>   |
| Cyprus (G)     | <i>Greek-Armenian</i> | Lithuania      | <i>Balto-Slavic</i>   | Thailand              | <i>Tai</i>           |
| Cyprus (T)     | <i>Turkic</i>         | Luxembourg     | <i>Italic</i>         | Trinidad and Tobago   | <i>Germanic</i>      |
| Czech Rep.     | <i>Balto-Slavic</i>   | Macedonia      | <i>Balto-Slavic</i>   | Tunisia               | <i>Semitic</i>       |
| Denmark        | <i>Germanic</i>       | Malaysia       | <i>Austronesian</i>   | Turkey                | <i>Turkic</i>        |
| Dominican Rep. | <i>Italic</i>         | Mali           | <i>Italic</i>         | Uganda                | <i>Niger_Congo</i>   |
| Ecuador        | <i>Italic</i>         | Malta          | <i>Semitic</i>        | Ukraine               | <i>Balto-Slavic</i>  |
| Egypt          | <i>Semitic</i>        | Mexico         | <i>Italic</i>         | United States         | <i>Germanic</i>      |
| El Salvador    | <i>Italic</i>         | Moldova        | <i>Italic</i>         | Uruguay               | <i>Italic</i>        |
| Estonia        | <i>Uralic</i>         | Morocco        | <i>Semitic</i>        | Uzbekistan            | <i>Turkic</i>        |
| Ethiopia       | <i>Semitic</i>        | Netherlands    | <i>Germanic</i>       | Venezuela             | <i>Italic</i>        |
| Finland        | <i>Uralic</i>         | New Zealand    | <i>Germanic</i>       | Viet Nam              | <i>Austroasiatic</i> |
| France         | <i>Italic</i>         | Nigeria        | <i>Germanic</i>       | Yemen                 | <i>Semitic</i>       |
| Georgia        | <i>Kartvelian</i>     | North Ireland  | <i>Germanic</i>       | Zambia                | <i>Germanic</i>      |
| Germany        | <i>Germanic</i>       | Norway         | <i>Germanic</i>       | Zimbabwe              | <i>Germanic</i>      |
| Ghana          | <i>Germanic</i>       | Pakistan       | <i>Indo-Aryan</i>     |                       |                      |
| Great Britain  | <i>Germanic</i>       | Palestine      | <i>Semitic</i>        |                       |                      |
